# Supplementary material for: Rapid Discrimination of Neuromyelitis Optica Spectrum Disorder and Multiple Sclerosis Using Machine Learning on Infrared Spectra of Sera
Source: MDPI journal article supplement (doi:10.3390/ijms23052791), 2022-03-03
Supplement: s1 [file s1]

## SUPPORTING INFORMATION

### Rapid discrimination of neuromyelitis optica spectrum disorder and multiple sclerosis using machine learning on infrared spectra of sera

Youssef El Khoury<sup>1,\*</sup>, Marie Gebelin<sup>1</sup>, Jérôme de Sèze<sup>3</sup>, Christine Patte-Mensah<sup>2</sup>, Gilles Marcou<sup>4</sup>, Alexandre Varnek<sup>4</sup>, Ayikoé-Guy Mensah-Nyagan<sup>2,§</sup>, Petra Hellwig<sup>1,§</sup>, and Nicolas Collongues<sup>2,3,5 \*</sup>

- <sup>1</sup> Laboratory of Bioelectrochemistry and Spectroscopy, UMR 7140 University of Strasbourg, CNRS, 4 Rue Blaise Pascal, 67000 Strasbourg, France; marie.gebelin@etu.unistra.fr (M.G.); hellwig@unistra.fr (P.H.)
- <sup>2</sup> Biopathology of Myelin, Neuroprotection and Therapeutic Strategies, INSERM U1119, Federation of Translational Medicine of Strasbourg, Université of Strasbourg. 1, Rue Eugène Boeckel, 67000 Strasbourg, France; Jerome.deseze@chru-strasbourg.fr (J.d.S.); cmensah@unistra.fr (C.P.-M.); gmensah@unistra.fr (A.-G.M.-N.)
- <sup>3</sup> Department of Neurology, University Hospital of Strasbourg, 1 Avenue Molière, 67200 Strasbourg, France
- <sup>4</sup> Laboratory of Chemoinformatics, UMR 7140 University of Strasbourg/CNRS, 4 Rue Blaise Pascal, 67000 Strasbourg, France; g.marcou@unistra.fr (G.M.); varnek@unistra.fr (A.V.)
- <sup>5</sup> University Department of Pharmacology, Addictology, Toxicology and Therapeutic, University of Strasbourg, 67000 Strasbourg, France
- <sup>§</sup> Co-seniority for A.-G.M.-N. (Head of INSERM U1119) and P.H. (Head of UMR 7140)
- \* Correspondence: elkhoury@unistra.fr (Y.E.K.); nicolas.collongues@chru-strasbourg.fr (N.C.)

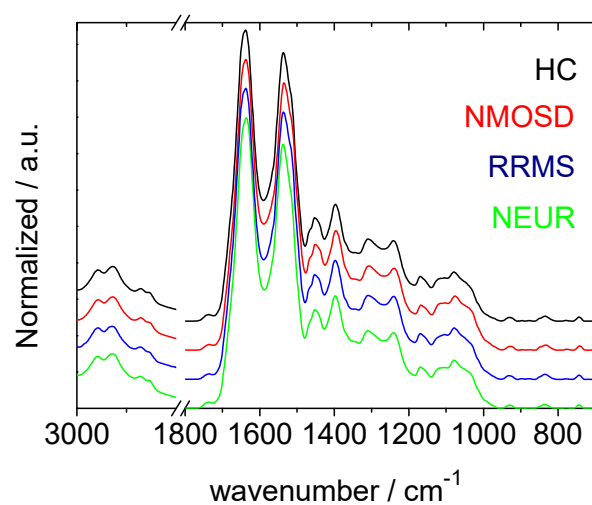

**Figure S1.** Normalized average spectra of the HC samples (black), NMOSD (red), RRMS (blue) and NEUR (green) in the 3000-2800, 1800-700 cm<sup>-1</sup> spectral range.

**Table S1.** Assignments<sup>[1-4]</sup> of the FTIR signals of the averaged spectra shown in **Fig. S1**. The position of the maxima in  $\text{cm}^{-1}$  is given for the HC averaged spectrum. The maximal deviation of the peaks in the average spectra of NMOSD, RRMS and NEUR relative to the peaks' maxima found in the HC spectrum is indicated in parentheses.

| Position / $\text{cm}^{-1}$ | Biomolecule                     |
|-----------------------------|---------------------------------|
| 2958 ( $\pm 1$ )            | Lipids and proteins             |
| 2929 ( $\pm 1$ )            | Lipids and proteins             |
| 2871 ( $\pm 1$ )            | Lipids and proteins             |
| 2852 ( $\pm 1$ )            | Lipids and proteins             |
| 1738 ( $\pm 2$ )            | Lipids (Ester C=O)              |
| 1640 ( $\pm 4$ )            | Proteins                        |
| 1537 ( $\pm 2$ )            | Proteins                        |
| 1453 ( $\pm 1$ )            | Lipids and proteins             |
| 1397 ( $\pm 1$ )            | Lipids and proteins             |
| 1307 ( $\pm 1$ )            | Proteins                        |
| 1240 ( $\pm 2$ )            | DNA                             |
| 1169 ( $\pm 2$ )            | Glycoproteins and carbohydrates |
| 1117 ( $\pm 3$ )            | RNA                             |
| 1104 ( $\pm 1$ )            | Carbohydrates                   |
| 1080 ( $\pm 2$ )            | Carbohydrates, DNA, RNA         |
| 1031 ( $\pm 1$ )            | Carbohydrates and DNA           |
| 929 ( $\pm 3$ )             | Left-handed DNA (Z-form)        |
| 834 ( $\pm 2$ )             | DNA (B and Z forms)             |
| 746 ( $\pm 2$ )             | DNA                             |

**Table S2.** Performances (confusion matrix, ROC AUC, sensitivity, specificity, and precision) of a randomly resampled dataset (with equal class sizes) from the original data set used to produce Table 1 of the main text. The first row concerns two-fold cross-validation on the training set (30 HC, 30 NMOSD, 30 RRMS and 30 NEUR). The values in parentheses correspond to a ten-iteration internal validation of the model. The dark gray rows record the performances on the original validation set (10 HC, 6 NMOSD, 6 RRMS and 5 NEUR) and the light gray rows record the performances on a randomly resampled validation set with equal class sizes (5 HC, 5 NMOSD, 5 RRMS and 5 NEUR). True positives are in bold and false negatives/false positives are in italics.

| Pathology               |       | Classified as |           |           |           | ROC AUC (%)        | Sensitivity (%)    | Specificity (%)     | Precision (%)      |
|-------------------------|-------|---------------|-----------|-----------|-----------|--------------------|--------------------|---------------------|--------------------|
|                         |       | HC            | NMOSD     | RRMS      | NEUR      |                    |                    |                     |                    |
| 2-fold cross-validation | HC    | <b>27</b>     | 3         | 0         | 0         | 98.9<br>(99.7±0.3) | 90.0<br>(94.0±6.8) | 97.8<br>(99.1±1.8)  | 93.1<br>(97.6±4.8) |
|                         | NMOSD | 2             | <b>28</b> | 0         | 0         | 99.1<br>(96.6±0.4) | 93.3<br>(96.5±5.5) | 96.7<br>(89.4±15.2) | 90.3<br>(95.7±5.0) |
|                         | RRMS  | 0             | 0         | <b>30</b> | 0         | 100<br>(100±0.0)   | 100<br>(100±0.0)   | 100<br>(100±0.0)    | 100<br>(100±0.0)   |
|                         | NEUR  | 0             | 0         | 0         | <b>30</b> | 100<br>(100±0.0)   | 100<br>(98.8±1.0)  | 100<br>(97.7±3.9)   | 100<br>(99.2±1.3)  |
| Validation set          | HC    | <b>10</b>     | 0         | 0         | 0         | 100                | 100                | 100                 | 100                |
|                         | NMOSD | 0             | <b>6</b>  | 0         | 0         | 100                | 100                | 100                 | 100                |
|                         | RRMS  | 0             | 0         | <b>6</b>  | 0         | 100                | 100                | 100                 | 100                |
|                         | NEUR  | 0             | 0         | 0         | <b>5</b>  | 100                | 100                | 100                 | 100                |
| Validation set          | HC    | <b>5</b>      | 0         | 0         | 0         | 100                | 100                | 100                 | 100                |
|                         | NMOSD | 0             | <b>5</b>  | 0         | 0         | 100                | 100                | 100                 | 100                |
|                         | RRMS  | 0             | 0         | <b>5</b>  | 0         | 100                | 100                | 100                 | 100                |
|                         | NEUR  | 0             | 0         | 0         | <b>5</b>  | 100                | 100                | 100                 | 100                |

**Table S3.** Demographic details of the NMOSD patients participating in the study, including the confirmed serostatus as well as the age at which the serum sample was taken.

**ID:** patient ID. **Gender:** male (M) or female (F). 26 M/34 F

**Age:** age at sample collection. Median age  $\pm$  standard deviation=32.0  $\pm$  18.4 years.

**Delay:** Delay in days between episode and sample collection. The median  $\pm$  standard deviation delay between the relapse and the sample collection for NMOSD patients was 20 $\pm$ 19 days for anti-AQP-4-positive patients, 25 $\pm$ 32 days for anti-MOG-positive patients and 176 $\pm$ 1287 days for DN patients. Median delay  $\pm$  standard deviation=27  $\pm$  863 days.

| ID | Gender | Age | serostatus | Delay | ID | Gender | Age | serostatus | Delay |
|----|--------|-----|------------|-------|----|--------|-----|------------|-------|
| 1  | F      | 25  | AQP-4      | 13    | 31 | F      | 24  | MOG        | 25    |
| 2  | F      | 52  | AQP-4      | 22    | 32 | F      | 21  | MOG        | 25    |
| 3  | F      | 56  | AQP-4      | 17    | 33 | F      | 13  | MOG        | 75    |
| 4  | M      | 80  | AQP-4      | 8     | 34 | M      | 43  | MOG        | 43    |
| 5  | F      | 55  | AQP-4      | 13    | 35 | F      | 14  | MOG        | NA    |
| 6  | F      | 67  | AQP-4      | 7     | 36 | F      | 6   | MOG        | 11    |
| 7  | F      | 25  | AQP-4      | 24    | 37 | M      | 16  | MOG        | 9     |
| 8  | F      | 62  | AQP-4      | 2     | 38 | M      | 6   | MOG        | 38    |
| 9  | F      | 29  | AQP-4      | 19    | 39 | M      | 13  | MOG        | 6     |
| 10 | F      | 55  | AQP-4      | 21    | 40 | M      | 7   | MOG        | 123   |
| 11 | M      | 40  | AQP-4      | 21    | 41 | F      | 26  | DN         | 129   |
| 12 | F      | 17  | AQP-4      | 41    | 42 | F      | 49  | DN         | 47    |
| 13 | F      | 32  | AQP-4      | 15    | 43 | M      | 33  | DN         | 21    |
| 14 | F      | 37  | AQP-4      | 27    | 44 | F      | 52  | DN         | 63    |
| 15 | M      | 24  | AQP-4      | 47    | 45 | F      | 47  | DN         | 6     |
| 16 | F      | 63  | AQP-4      | 48    | 46 | M      | 62  | DN         | 5     |
| 17 | F      | 44  | AQP-4      | 67    | 47 | M      | 18  | DN         | 3613  |
| 18 | F      | 65  | AQP-4      | 16    | 48 | M      | 61  | DN         | 2267  |
| 19 | F      | 31  | AQP-4      | 64    | 49 | M      | 58  | DN         | 3563  |
| 20 | F      | 53  | AQP-4      | 8     | 50 | F      | 22  | DN         | 46    |
| 21 | F      | 53  | MOG        | 72    | 51 | M      | 69  | DN         | 764   |
| 22 | M      | 32  | MOG        | 6     | 52 | F      | 29  | DN         | 58    |
| 23 | M      | 38  | MOG        | 4     | 53 | M      | 18  | DN         | 10    |
| 24 | M      | 26  | MOG        | 17    | 54 | F      | 35  | DN         | 1168  |
| 25 | M      | 53  | MOG        | 6     | 55 | F      | 22  | DN         | 2766  |

|    |   |    |     |    |    |   |    |    |      |
|----|---|----|-----|----|----|---|----|----|------|
| 26 | M | 36 | MOG | 49 | 56 | M | 25 | DN | 2088 |
| 27 | M | 26 | MOG | 15 | 57 | F | 30 | DN | 52   |
| 28 | M | 29 | MOG | 52 | 58 | F | 29 | DN | 238  |
| 29 | M | 30 | MOG | 63 | 59 | M | 45 | DN | 2316 |
| 30 | M | 73 | MOG | 11 | 60 | F | 25 | DN | 222  |

**Table S4.** Demographic details of the RRMS patients participating in the study, including the age at which the serum sample was taken.

**ID:** patient ID; **Gender:** male (M) or female (F). 19 M/41 F; **Age:** age at sample collection. Mean age 31.5±9.4 years; **EDSS:** Patient's Expanded Disability Status Scale score; **Delay 1:** Delay in days between episode and EDSS; **Delay 2:** Delay in days between episode and sample collection. Median delay 2 ± standard deviation=21±97 days.

| ID | Gender | age | EDSS | Delay 1 | Delay 2 | ID | Gender | age | EDSS | Delay 1 | Delay 2 |
|----|--------|-----|------|---------|---------|----|--------|-----|------|---------|---------|
| 1  | M      | 31  | 0.0  | 49      | 37      | 31 | F      | 22  | 0.0  | 111     | 112     |
| 2  | M      | 23  | 3.0  | 16      | 19      | 32 | F      | 28  | 3.0  | 6       | 11      |
| 3  | F      | 36  | 2.0  | 6       | 10      | 33 | F      | 22  | 1.0  | 13      | 14      |
| 4  | F      | 22  | 2.0  | 32      | 32      | 34 | F      | 48  | 1.5  | 36      | 33      |
| 5  | M      | 24  | 3.0  | 3       | 3       | 35 | M      | 35  | 0.0  | 3       | 7       |
| 6  | F      | 47  | 1.0  | 74      | 74      | 36 | F      | 22  | 0.0  | 153     | 154     |
| 7  | M      | 21  | 1.0  | 10      | 13      | 37 | F      | 40  | 2.5  | 249     | 245     |
| 8  | F      | 19  | 1.5  | 111     | 93      | 38 | F      | 33  | 2.0  | 11      | 11      |
| 9  | M      | 33  | 1.0  | 16      | 19      | 39 | M      | 36  | 0.0  | 33      | 33      |
| 10 | F      | 18  | 2.0  | 12      | 15      | 40 | M      | 29  | 2.0  | 107     | 2       |
| 11 | M      | 22  | 2.0  | 15      | 16      | 41 | M      | 33  | 3.0  | 10      | 10      |
| 12 | F      | 24  | 2.0  | 13      | 18      | 42 | M      | 39  | 2.0  | 69      | 21      |
| 13 | F      | 39  | 2.0  | 11      | 8       | 43 | F      | 22  | 2.0  | 35      | 7       |
| 14 | F      | 42  | 1.0  | 86      | 86      | 44 | F      | 36  | 2.0  | 27      | 27      |
| 15 | M      | 28  | 1.5  | 824     | 593     | 45 | F      | 37  | 1.5  | 76      | 57      |
| 16 | F      | 19  | 3.0  | 2       | 4       | 46 | M      | 40  | 2.0  | 76      | 25      |
| 17 | F      | 42  | 1.0  | 5       | 5       | 47 | F      | 37  | 1.5  | 109     | 21      |
| 18 | F      | 37  | 3.0  | 4       | 11      | 48 | F      | 38  | 0.0  | 12      | 9       |
| 19 | F      | 34  | 1.0  | 0       | 22      | 49 | F      | 25  | 3.0  | 34      | 29      |
| 20 | F      | 50  | 2.0  | 58      | 58      | 50 | F      | 19  | 4.0  | 14      | 12      |
| 21 | F      | 44  | 1.0  | 17      | 17      | 51 | F      | 24  | 4.0  | 35      | 32      |
| 22 | M      | 37  | 0.0  | 36      | 42      | 52 | M      | 33  | 3.0  | 62      | 59      |

|           |   |    |     |     |     |           |   |    |     |     |     |
|-----------|---|----|-----|-----|-----|-----------|---|----|-----|-----|-----|
| <b>23</b> | F | 31 | 1.5 | 116 | 119 | <b>53</b> | M | 18 | 4.0 | 401 | 394 |
| <b>24</b> | F | 22 | 1.0 | 20  | 22  | <b>54</b> | F | 24 | 2.0 | 7   | 5   |
| <b>25</b> | M | 29 | 1.5 | 27  | 27  | <b>55</b> | M | 48 | 2.0 | 43  | 41  |
| <b>26</b> | F | 24 | 1.0 | 0   | 2   | <b>56</b> | F | 37 | 2.0 | 157 | 155 |
| <b>27</b> | F | 22 | 3.0 | 5   | 9   | <b>57</b> | F | 29 | 5.0 | 0   | 1   |
| <b>28</b> | F | 31 | 2.0 | 160 | 159 | <b>58</b> | F | 23 | 2.5 | 42  | 43  |
| <b>29</b> | F | 47 | 1.0 | 17  | 17  | <b>59</b> | F | 32 | 2.0 | 14  | 18  |
| <b>30</b> | M | 59 | 1.5 | 150 | 150 | <b>60</b> | F | 33 | 2.0 | 19  | 16  |

**Table S5.** Demographic details of the NEUR patients participating in the study. All patients suffered from chronic inflammatory demyelinating polyneuropathy. Serum samples were collected at least one month after the patient stabilized without immune globulin intravenous (IgIv) injection.

**ID: patient ID; Gender: male (M) or female (F). 25 M/10 F; Age at sample collection;**

**Median age  $\pm$  standard deviation=59.0  $\pm$  12.3 years.**

| <b>ID</b> | <b>Gender</b> | <b>Age</b> |
|-----------|---------------|------------|
| <b>1</b>  | M             | 64         |
| <b>2</b>  | M             | 51         |
| <b>3</b>  | F             | 70         |
| <b>4</b>  | M             | 75         |
| <b>5</b>  | M             | 66         |
| <b>6</b>  | F             | 54         |
| <b>7</b>  | M             | 57         |
| <b>8</b>  | M             | 44         |
| <b>9</b>  | F             | 66         |
| <b>10</b> | M             | 80         |
| <b>11</b> | M             | 55         |
| <b>12</b> | M             | 50         |
| <b>13</b> | M             | 72         |
| <b>14</b> | F             | 69         |
| <b>15</b> | M             | 61         |
| <b>16</b> | M             | 59         |
| <b>17</b> | F             | 51         |
| <b>18</b> | M             | 59         |
| <b>19</b> | M             | 59         |

|    |   |    |
|----|---|----|
| 20 | M | 53 |
| 21 | M | 83 |
| 22 | F | 66 |
| 23 | F | 82 |
| 24 | M | 56 |
| 25 | M | 43 |
| 26 | F | 58 |
| 27 | F | 64 |
| 28 | M | 78 |
| 29 | F | 48 |
| 30 | M | 67 |
| 31 | M | 24 |
| 32 | M | 68 |
| 33 | M | 57 |
| 34 | M | 54 |
| 35 | M | 51 |

**Table S6.** Demographic details of the HC subjects participating in the study, including the age at which the serum sample was taken; 80 subjects with 1:1 ratio M/F and 1:1 ratio of subjects younger/older than 60 years.

| Gender | Number of subjects | Younger than 60 years | Older than 60 years |
|--------|--------------------|-----------------------|---------------------|
| M      | 40                 | 20                    | 20                  |
| F      | 40                 | 20                    | 20                  |



**Figure S2.** ROC curves of the four patient groups used for the single-iteration of the random forest model presented in Table 1 of the main text. HC (black), NMOSD (red), RRMS (blue) and NEUR (green).

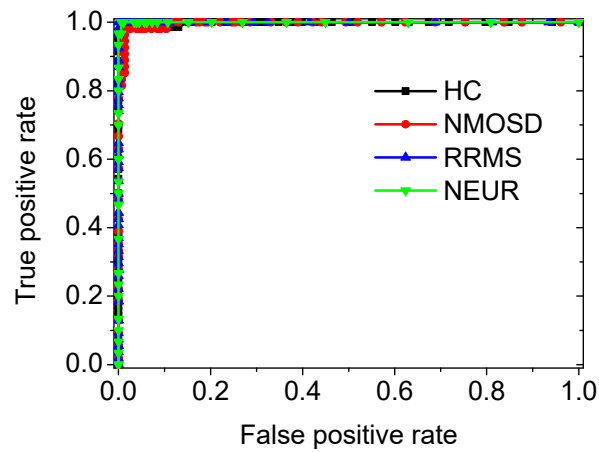

**Figure S3.** ROC curves of NMOSD patients according to their confirmed serostatus. DN (dark red), AQP-4 (violet), and MOG (light red).

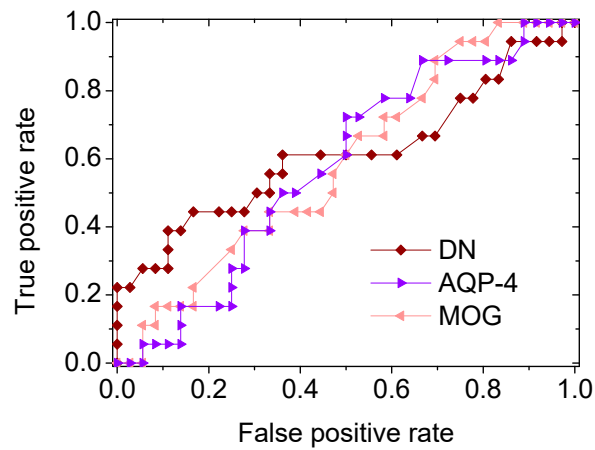

**Figure S4.** ROC curves of RRMS and NMOSD patients according to their confirmed serostatus. A) RRMS and DN; B) RRMS and AQP-4; C) RRMS and MOG. RRMS (blue squares), DN (dark red circles), AQP-4 (violet circles) and MOG (light red circles).

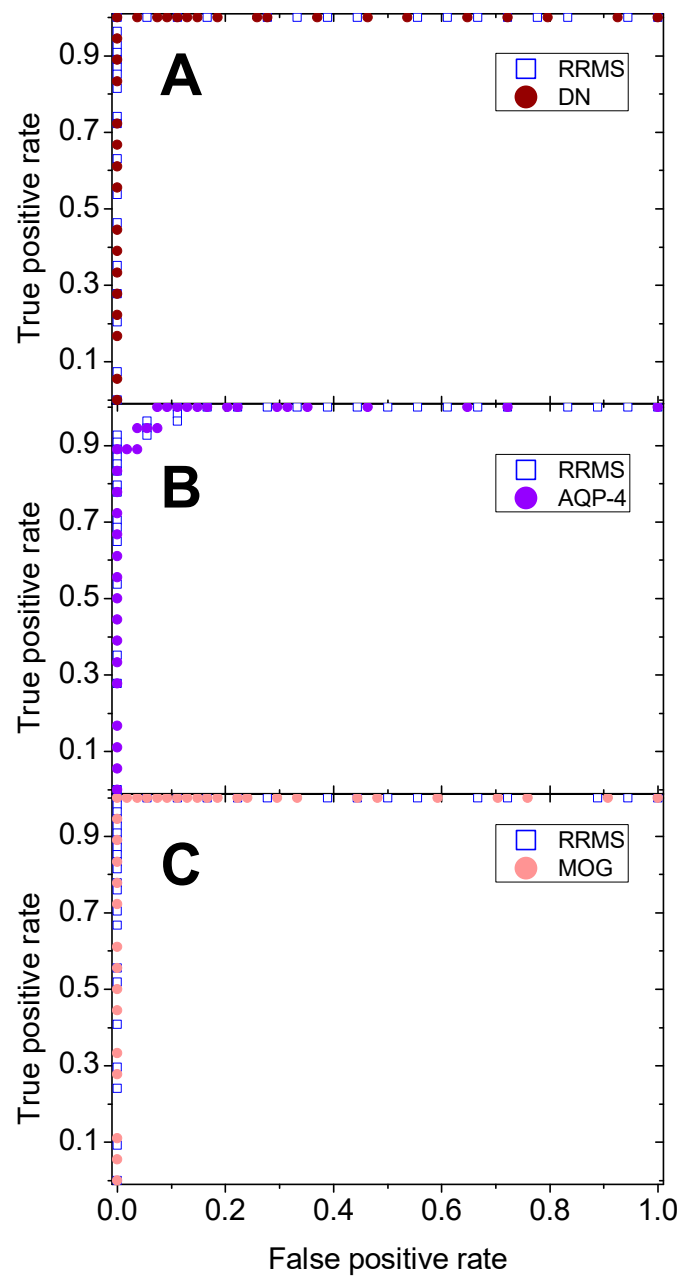

## References

1. Rehman, I.U.; Movasaghi, Z.; Rehman, S. *Vibrational spectroscopy for tissue analysis*, 1<sup>st</sup> Edition ed.; CRC Press: Boca Raton, **2012**.
2. Ghomi, M.; Letellier, R.; Liquier, J.; Taillandier, E. Interpretation of DNA vibrational spectra by normal coordinate analysis. *Int. J. Biochem.* **1990**, *22*, 691-699.
3. Baker, M.J.; Trevisan, J.; Bassan, P.; Bhargava, R.; Butler, H.J.; Dorling, K.M.; Fielden, P.R.; Fogarty, S.W.; Fullwood, N.J.; Heys, K.A.; *et al.* Using Fourier transform IR spectroscopy to analyze biological materials. *Nat. Protoc.* **2014**, *9*, 1771-1791, doi:10.1038/nprot.2014.110.
4. Barth, A. Infrared spectroscopy of proteins. *Biochim. Biophys. Acta* **2007**, *1767*, 1073-1101, doi:10.1016/j.bbabi.2007.06.004.
